# Supplementary material for: A cascade of a denitrification bioreactor and an aerobic biofilm reactor for heavy oil refinery wastewater treatment
Source: Royal Society of Chemistry journal article supplement (doi:10.1039/c8ra10510c), 2019-01-01
Supplement: c8ra10510c1.pdf [file c8ra10510c1.pdf]

## Supplementary Information

### A Cascade of Denitrification Bioreactor and Aerobic Biofilm Reactor for Heavy Oil Refinery Wastewater Treatment

Honghong Dong,<sup>a</sup> Xiaoyan Jiang,<sup>b</sup> Shanshan Sun,<sup>\*a</sup> Li Fang,<sup>b</sup> Wei Wang,<sup>a</sup> Kai Cui,<sup>a</sup> Tiantian Yao,<sup>a</sup> Heming Wang,<sup>a</sup> Zhiyong Zhang,<sup>a</sup> Ying Zhang,<sup>a</sup> Zhongzhi Zhang<sup>a</sup> and Pengcheng Fu<sup>c</sup>

<sup>a</sup> State Key Laboratory of Heavy Oil Processing, China University of Petroleum, Beijing, 102249, P. R. China

<sup>b</sup> China National Petroleum Corporation Liaohe Petrochemical Company, Panjin 124000, P. R. China

<sup>c</sup> State Key Laboratory of Marine Resource Utilization in South China Sea, Hainan University, Hainan 570228, P.R. China

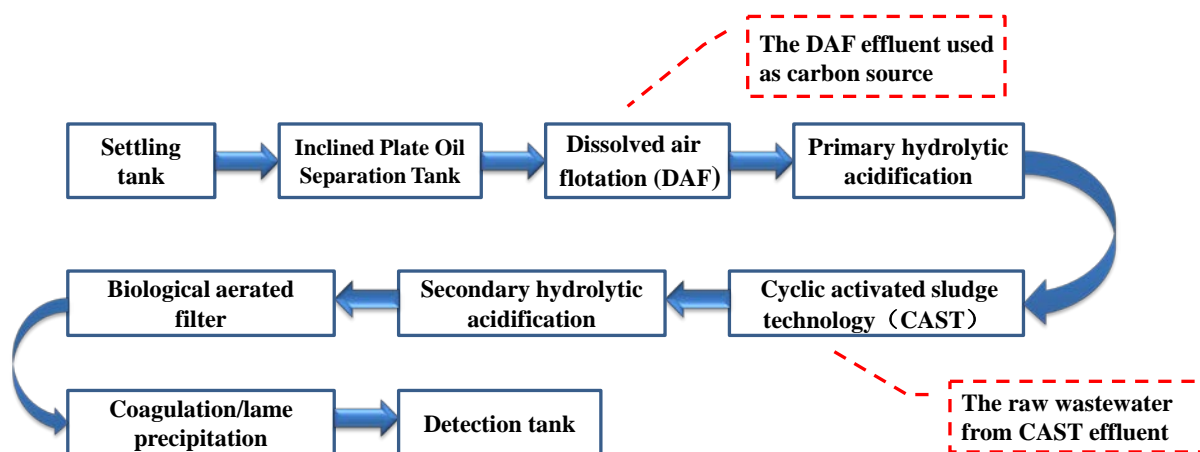

**Fig. S1** The full process flow about the technological processes of Liaohé Petrochemical Branch Company include CAST and secondary DAF effluent.

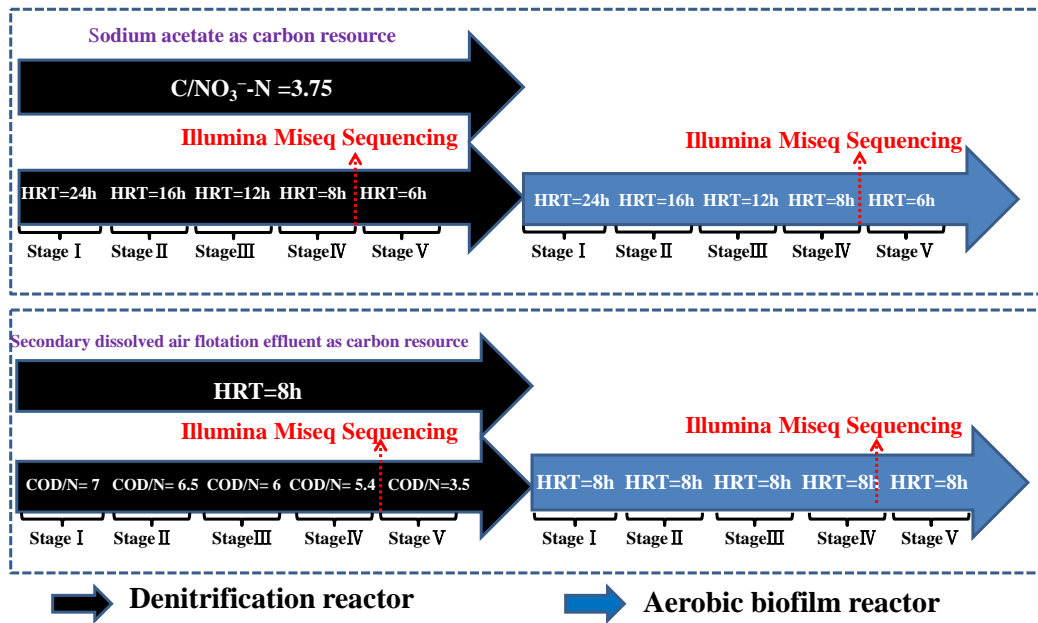

**Fig. S2** A schematic flow of the whole experimental steps.

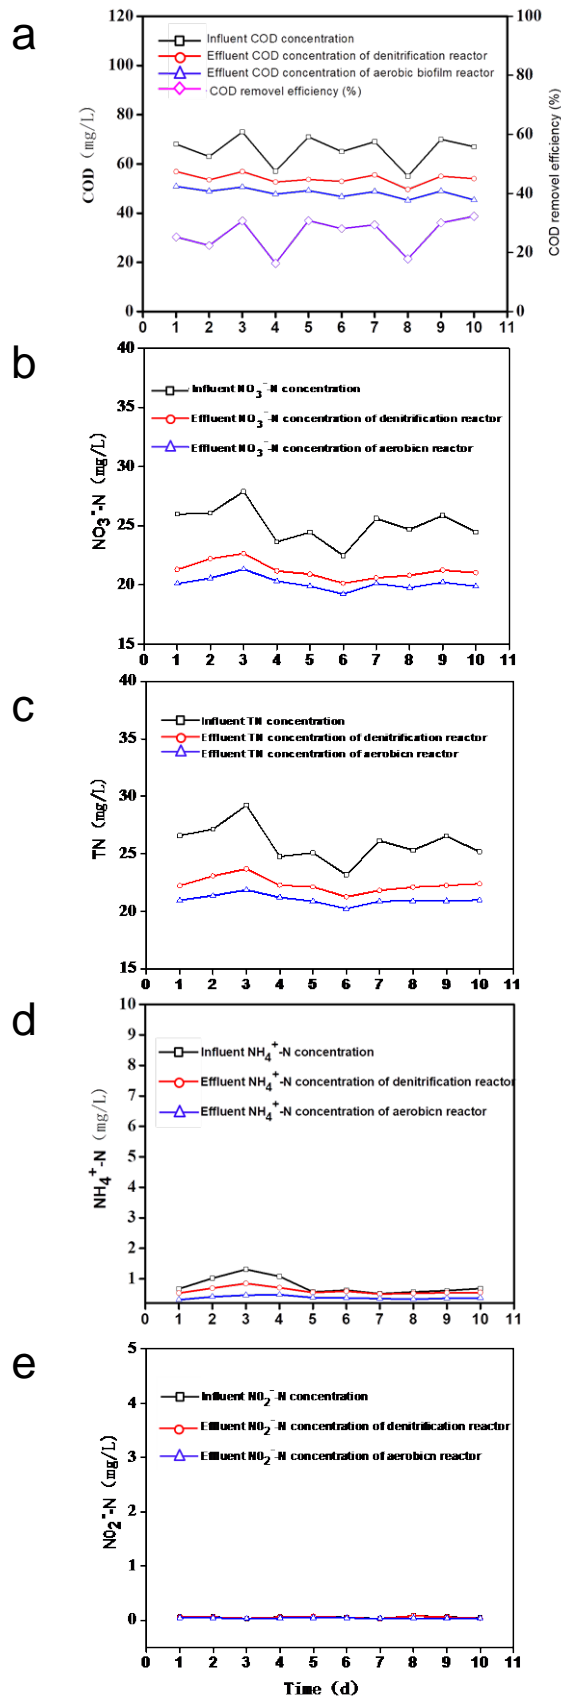

**Fig. S3** Operational performance of bioreactors: the variations in COD (a), nitrate nitrogen (b), total nitrogen (c), ammonium nitrogen (d), and nitrite nitrogen concentration (e) under HRT of 25h without adding carbon at the start phase of laboratory-scale experiment.

Table S1 the original wastewater characterization

| Parameter                       | Concentration (mg/L) |
|---------------------------------|----------------------|
| COD                             | 875.6±5.6            |
| BOD <sub>5</sub>                | 306.4±3.1            |
| Oil                             | 85.1±0.6             |
| TN                              | 42.5±0.2             |
| NH <sub>3</sub> -N              | 37.2±0.2             |
| NO <sub>3</sub> <sup>-</sup> -N | 0.801±0.002          |
| Sulfide                         | 3.3±0.01             |
| Volatile phenol                 | 24.1±0.21            |
| SS                              | 86.2±0.4             |
| pH                              | 8.22±0.05            |
